# Supplementary material
Source: publisher site journal article supplement (https://www.spandidos-publications.com/3651/downloadSupplementary)
Supplement: Supplementary file 1 [file downloadSupplementary]

## Sheet: Sheet1
Table SIV. Raw data of serum CTSS determined by ELISA.
No.	Well No.	Sample No.	Absorbance	Calibrated OD Value	Quantitative Value (Dilution ratio 1:5)	Final Concentration, pg/ml	Item Name
1	A2	1-1	0.8285	0.7103	861.905	4309.52	CTSS
2	A3	2-1	0.7525	0.6343	738.3	3691.5	CTSS
3	A4	3-1	0.9726	0.8544	1095.03	5475.15	CTSS
4	A5	4-1	1.2141	1.0959	1526.98	7634.9	CTSS
5	A6	5-1	0.7156	0.5974	677.918	3389.59	CTSS
6	A7	6-1	0.9886	0.8704	1121.21	5606.05	CTSS
7	A8	7-1	0.8984	0.7802	974.81	4874.05	CTSS
8	A9	8-1	0.7433	0.6251	723.263	3616.32	CTSS
9	A10	9-1	0.8714	0.7532	931.241	4656.2	CTSS
10	A11	10-1	0.8011	0.6829	817.471	4087.36	CTSS
11	A12	11-1	0.711	0.5928	670.38	3351.9	CTSS
12	B2	1-1	0.8388	0.7206	878.574	4392.87	CTSS
13	B3	2-1	0.7447	0.6265	725.552	3627.76	CTSS
14	B4	3-1	0.9775	0.8593	1103.03	5515.15	CTSS
15	B5	4-1	1.1827	1.0645	1463.74	7318.7	CTSS
16	B6	5-1	0.695	0.5768	644.149	3220.74	CTSS
17	B7	6-1	0.9828	0.8646	1111.7	5558.5	CTSS
18	B8	7-1	0.9072	0.789	989.013	4945.07	CTSS
19	B9	8-1	0.7316	0.6134	704.122	3520.61	CTSS
20	B10	9-1	0.8825	0.7643	949.154	4745.77	CTSS
21	B11	10-1	0.793	0.6748	804.308	4021.54	CTSS
22	B12	11-1	0.7151	0.5969	677.099	3385.5	CTSS
23	C2	12-1	0.942	0.8238	1045.28	5226.4	CTSS
24	C3	13-1	0.7193	0.6011	683.98	3419.9	CTSS
25	C4	14-1	0.743	0.6248	722.773	3613.87	CTSS
26	C5	15-1	0.9966	0.8784	1134.36	5671.8	CTSS
27	C6	16-1	1.0728	0.9546	1262.47	6312.35	CTSS
28	C7	17-1	0.8419	0.7237	883.588	4417.94	CTSS
29	C8	1-2	0.7475	0.6293	730.13	3650.65	CTSS
30	C9	2-2	0.7342	0.616	708.377	3541.88	CTSS
31	C10	3-2	1.1178	0.9996	1341.79	6708.95	CTSS
32	C11	4-2	0.8939	0.7757	967.548	4837.74	CTSS
33	C12	12-1	0.9513	0.8331	1060.36	5301.8	CTSS
34	D2	13-1	0.73	0.6118	701.503	3507.52	CTSS
35	D3	14-1	0.7374	0.6192	713.613	3568.07	CTSS
36	D4	15-1	0.9854	0.8672	1115.96	5579.8	CTSS
37	D5	16-1	1.0521	0.9339	1227.04	6135.2	CTSS
38	D6	17-1	0.8419	0.7237	883.588	4417.94	CTSS
39	D7	1-2	0.7329	0.6147	706.25	3531.25	CTSS
40	D8	2-2	0.7321	0.6139	704.941	3524.7	CTSS
41	D9	3-2	1.0898	0.9716	1292.03	6460.15	CTSS
42	D10	4-2	0.9021	0.7839	980.781	4903.9	CTSS
43	D11	5-2	0.6151	0.4969	513.48	2567.4	CTSS
44	D12	6-2	0.9124	0.7942	997.408	4987.04	CTSS
45	E2	7-2	0.9324	0.8142	1029.73	5148.65	CTSS
46	E3	8-2	0.7118	0.5936	671.691	3358.45	CTSS
47	E4	9-2	0.7921	0.6739	802.845	4014.23	CTSS
48	E5	10-2	0.6519	0.5337	573.519	2867.6	CTSS
49	E6	11-2	0.6774	0.5592	615.291	3076.46	CTSS
50	E7	12-2	1.0256	0.9074	1182.42	5912.1	CTSS
51	E8	13-2	0.6624	0.5442	590.71	2953.55	CTSS
52	E9	14-2	0.6982	0.58	649.396	3246.98	CTSS
53	E10	15-2	0.7577	0.6395	746.792	3733.96	CTSS
54	E11	5-2	0.6003	0.4821	489.477	2447.38	CTSS
55	E12	6-2	0.9245	0.8063	1016.96	5084.8	CTSS
56	F2	7-2	0.9284	0.8102	1023.26	5116.3	CTSS
57	F3	8-2	0.7059	0.5877	662.02	3310.1	CTSS
58	F4	9-2	0.8056	0.6874	824.779	4123.9	CTSS
59	F5	10-2	0.6676	0.5494	599.229	2996.15	CTSS
60	F6	11-2	0.6817	0.5635	622.341	3111.7	CTSS
61	F7	12-2	1.0789	0.9607	1273.02	6365.1	CTSS
62	F8	13-2	0.6796	0.5614	618.898	3094.49	CTSS
63	F9	14-2	0.7072	0.589	664.151	3320.75	CTSS
64	F10	15-2	0.769	0.6508	765.23	3826.15	CTSS
65	F11	16-2	0.9567	0.8385	1069.13	5345.65	CTSS
66	F12	17-2	0.7971	0.6789	810.973	4054.86	CTSS
67	G2	S7	1.8022	1.684	N/A	N/A	CTSS
68	G3	S6	1.3763	1.2581	N/A	N/A	CTSS
69	G4	S5	0.8823	0.7641	N/A	N/A	CTSS
70	G5	S4	0.6339	0.5157	N/A	N/A	CTSS
71	G6	S3	0.4282	0.31	N/A	N/A	CTSS
72	G7	S2	0.3606	0.2424	N/A	N/A	CTSS
73	G8	S1	0.2882	0.17	N/A	N/A	CTSS
74	G9	S0	0.1147	-0.0035	N/A	N/A	CTSS
75	G10	16-2	0.946	0.8278	1051.76	5258.8	CTSS
76	G11	17-2	0.7964	0.6782	809.835	4049.18	CTSS
77	G12	S7	1.7673	1.6491	N/A	N/A	CTSS
78	H2	S6	1.4342	1.316	N/A	N/A	CTSS
79	H3	S5	0.899	0.7808	N/A	N/A	CTSS
80	H4	S4	0.652	0.5338	N/A	N/A	CTSS
81	H5	S3	0.4217	0.3035	N/A	N/A	CTSS
82	H6	S2	0.3359	0.2177	N/A	N/A	CTSS
83	H7	S1	0.2554	0.1372	N/A	N/A	CTSS
84	H8	S0	0.1217	0.0035	N/A	N/A	CTSS
CTSS, cathepsin S; N/A, not applicable.
